# Supplementary material
Source: publisher figshare collection journal article supplement (https://acs.figshare.com/ndownloader/files/10651333)

Development of an analytical method for analyzing pyrrolizidine alkaloids in different groups  
of food by UPLC-MS/MS

Stephen W.C. Chung<sup>1</sup>, Chi-Ho Lam

Food Research Laboratory, Centre for Food Safety, Food and Environmental Hygiene  
Department, 4/F Public Health Laboratory Centre, 382 Nam Cheong Street, Hong Kong

---

<sup>1</sup> Author to whom correspondence should be addressed.  
e-mail: [swcchung@fehd.gov.hk](mailto:swcchung@fehd.gov.hk)

Table S1 SPE elution profile with neutralized, alkaline and acidic extract

|     | pH 6.7                               |                                              | pH 8.4               |                                              | pH 3.4               |                                              |
|-----|--------------------------------------|----------------------------------------------|----------------------|----------------------------------------------|----------------------|----------------------------------------------|
| PAs | 1st eluate<br>(MeOH)                 | 2nd eluate<br>(2.5% NH <sub>3</sub><br>MeOH) | 1st eluate<br>(MeOH) | 2nd eluate<br>(2.5% NH <sub>3</sub><br>MeOH) | 1st eluate<br>(MeOH) | 2nd eluate<br>(2.5% NH <sub>3</sub><br>MeOH) |
|     | Recoveries without IS correction (%) |                                              |                      |                                              |                      |                                              |
| Em  | 73                                   | 0                                            | 69                   | 0                                            | 0                    | 87                                           |
| EmN | 75                                   | 0                                            | 76                   | 0                                            | 11                   | 70                                           |
| Er  | 69                                   | 0                                            | 73                   | 0                                            | 0                    | 83                                           |
| ErN | 73                                   | 0                                            | 74                   | 0                                            | 37                   | 42                                           |
| Eu  | 72                                   | 0                                            | 69                   | 0                                            | 0                    | 84                                           |
| EuN | 74                                   | 0                                            | 73                   | 0                                            | 0                    | 89                                           |
| Hn  | 74                                   | 0                                            | 76                   | 0                                            | 0                    | 94                                           |
| HnN | 71                                   | 0                                            | 74                   | 0                                            | 0                    | 85                                           |
| Im  | 72                                   | 0                                            | 73                   | 0                                            | 0                    | 88                                           |
| ImN | 71                                   | 0                                            | 76                   | 0                                            | 0                    | 91                                           |
| Jb  | 69                                   | 0                                            | 65                   | 0                                            | 0                    | 85                                           |
| JbN | 72                                   | 0                                            | 73                   | 0                                            | 52                   | 23                                           |
| Lc  | 70                                   | 2                                            | 64                   | 2                                            | 0                    | 81                                           |
| LcN | 73                                   | 0                                            | 65                   | 0                                            | 16                   | 54                                           |
| La  | 75                                   | 0                                            | 70                   | 0                                            | 0                    | 82                                           |
| LaN | 76                                   | 0                                            | 76                   | 0                                            | 0                    | 85                                           |
| Mc  | 72                                   | 0                                            | 73                   | 0                                            | 10                   | 61                                           |
| McN | 68                                   | 0                                            | 70                   | 0                                            | 22                   | 57                                           |
| Re  | 71                                   | 0                                            | 72                   | 0                                            | 0                    | 86                                           |
| ReN | 79                                   | 0                                            | 78                   | 0                                            | 24                   | 61                                           |
| Sc  | 74                                   | 0                                            | 70                   | 0                                            | 0                    | 88                                           |
| ScN | 75                                   | 0                                            | 74                   | 0                                            | 12                   | 63                                           |
| Sp  | 72                                   | 0                                            | 74                   | 0                                            | 0                    | 70                                           |
| SpN | 71                                   | 0                                            | 68                   | 0                                            | 12                   | <b>15<sup>1</sup></b>                        |
| Sv  | 72                                   | 0                                            | 61                   | 0                                            | 0                    | 83                                           |
| SvN | 72                                   | 0                                            | 79                   | 0                                            | 19                   | 66                                           |
| Sk  | <b>58</b>                            | <b>11<sup>2</sup></b>                        | <b>51</b>            | <b>12<sup>2</sup></b>                        | 0                    | 82                                           |
| Td  | 64                                   | 0                                            | 68                   | 0                                            | 0                    | 84                                           |

Remarks: 1, SpN degradation in alkaline MeOH.

2, Sk completely eluted in alkaline MeOH.

Table S2 Estimates of LOQs of 28PAs in different food matrices

|                    | Estimated LOQs                  |
|--------------------|---------------------------------|
|                    | Range ( $\mu\text{g kg}^{-1}$ ) |
| Cow milk           | 0.010-0.040                     |
| Tea infusion       | 0.015-0.075                     |
| Honey              | 0.014-0.074                     |
| Cooked chicken egg | 0.013-0.052                     |
| Cooked beef        | 0.010-0.087                     |
| Barley flour       | 0.011-0.063                     |
| Clove leave        | 0.04-0.76                       |

Figure S1 Chromatogram of quantitation MRMs of PAs/PANs at concentration of  $0.1 \mu\text{g L}^{-1}$

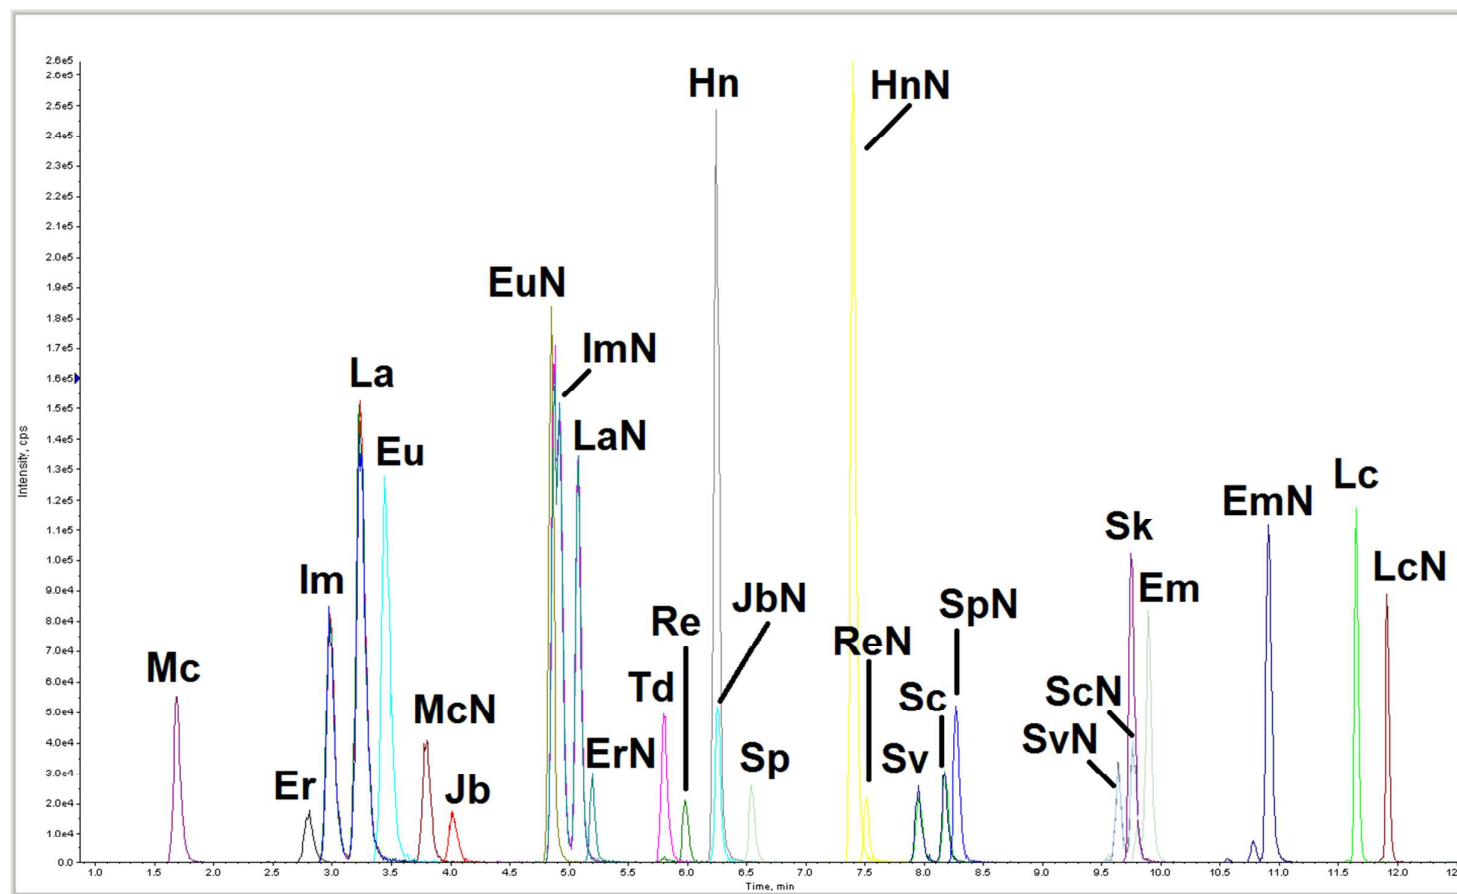

Figure S2 Milky milk extracts becomes translucent after the freeze-out steps

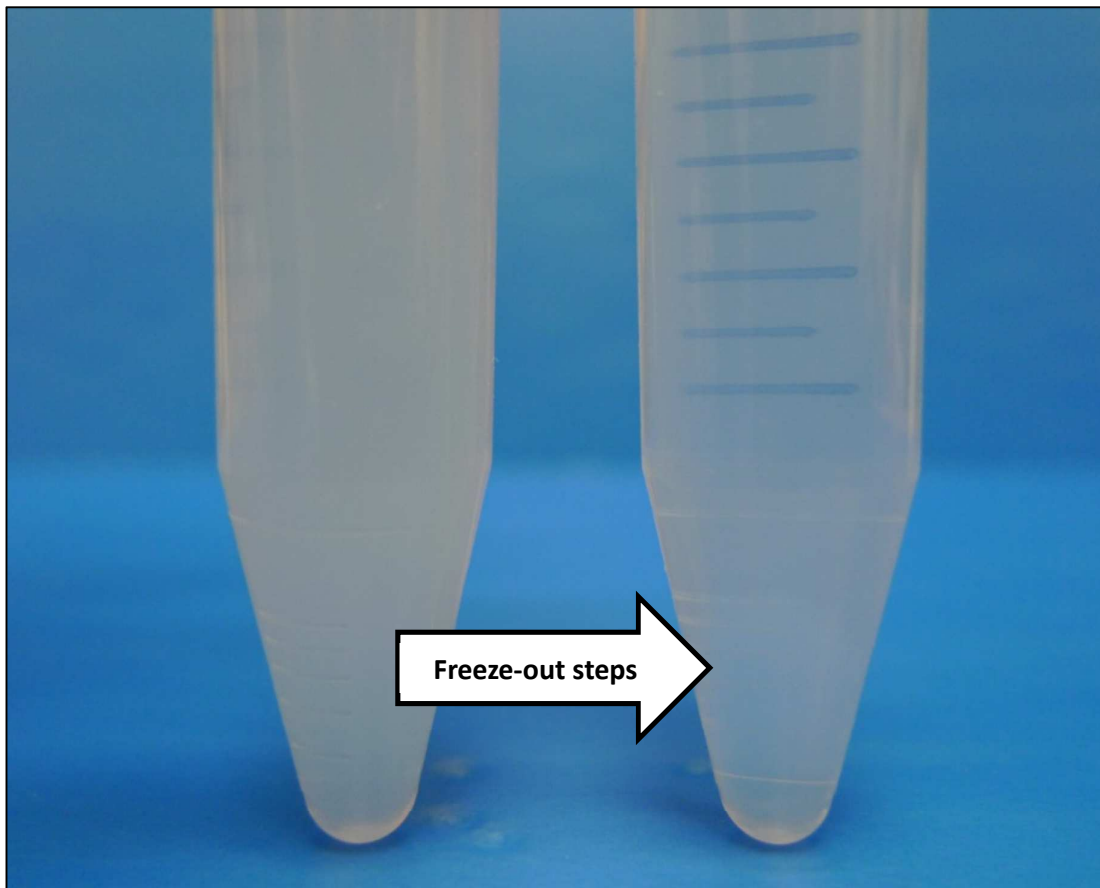

Figure S3 Sample solutions (left: black tea; right: black pepper) with and without the acetonitrile washing step

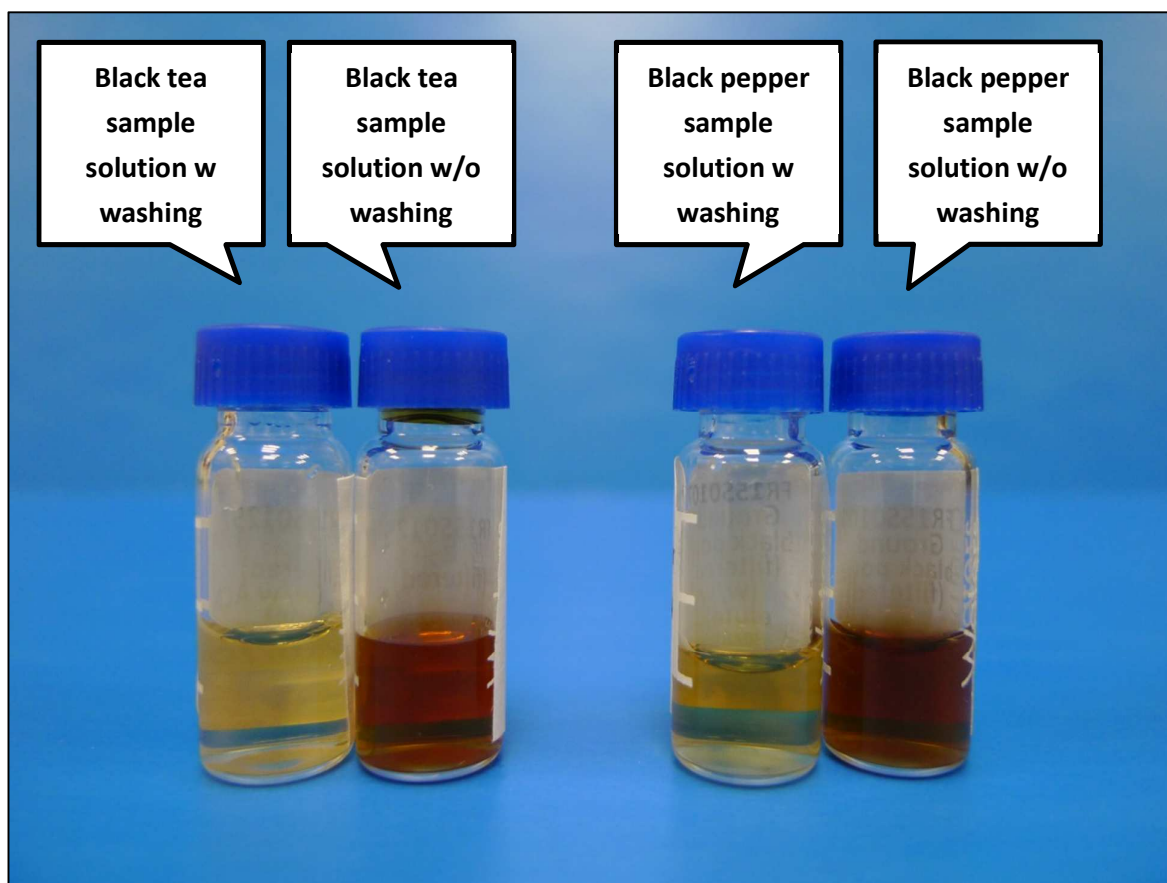

Figure S4 Lasiocarpine responses in water with different percentages of methanol

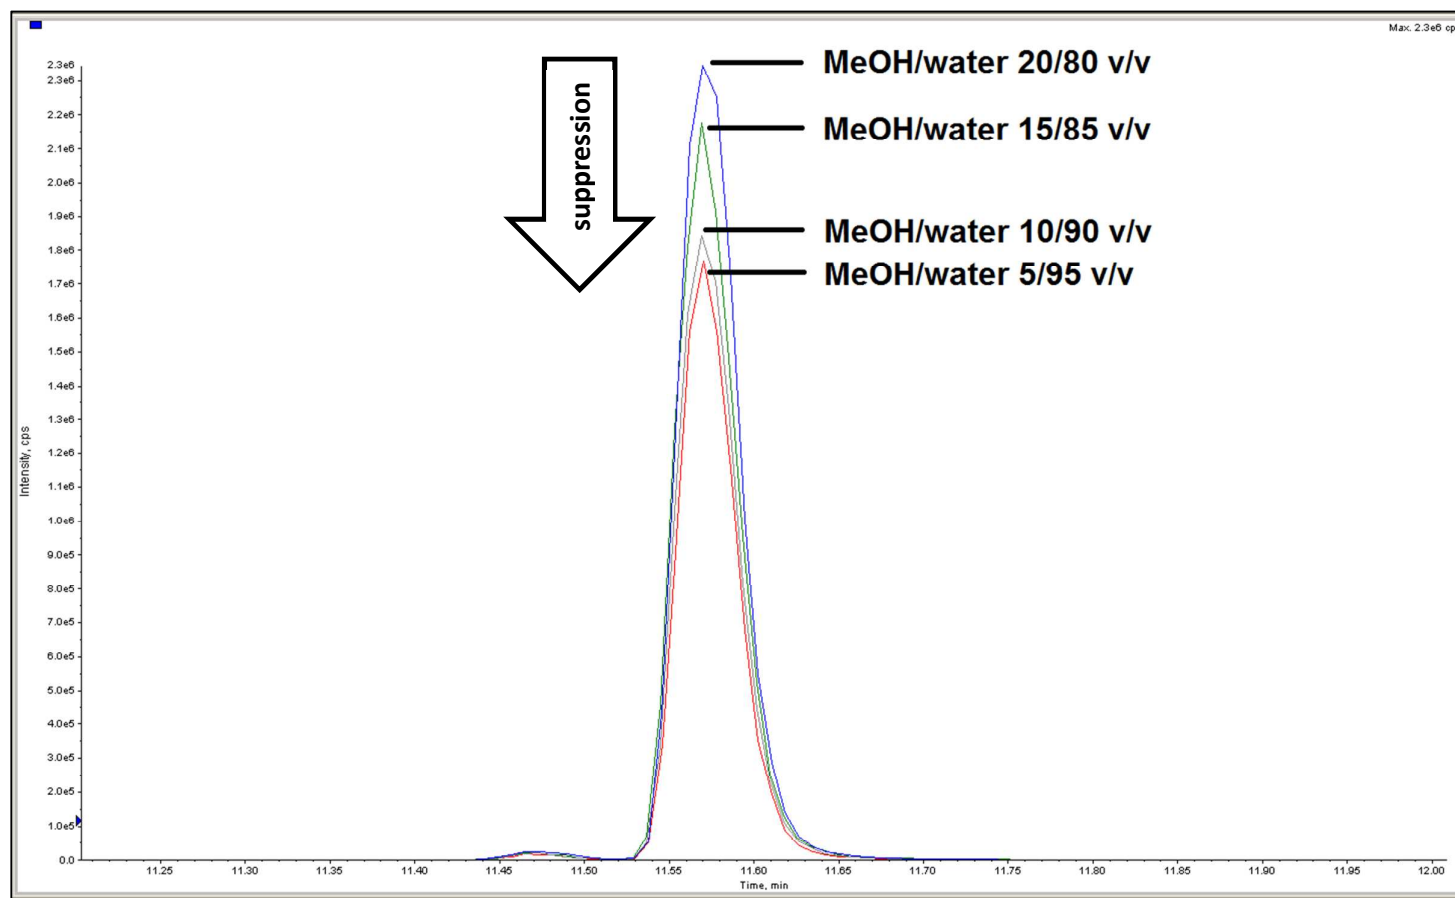

Supplement: Supplementary file 1 [file 10651333]
